# Supplementary material
Source: PubMed Central journal article supplement (PMC4810699)
Supplement: JVI.02793-15_zjv999091361so1.pdf [file JVI.02793-15_zjv999091361so1.pdf]

Table S1. Number of reads mapped to the genome of the putative viruses in the China sample.

| Putative Virus   | Number of Reads <sup>a</sup> | % of Reads |
|------------------|------------------------------|------------|
| <b>Total RNA</b> | 11,216,334                   | 100        |
| DcRV-Seg.1       | 1,831,120                    | 16.33      |
| DcRV-Seg.2       | 1,393,426                    | 12.42      |
| DcRV-Seg.3       | 1,602,937                    | 14.29      |
| DcRV-Seg.4       | 1,539,470                    | 13.73      |
| DcRV-Seg.7       | 488,079                      | 4.35       |
| DcRV-Seg.8       | 483,744                      | 4.31       |
| DcRV-Seg.10      | 366,619                      | 3.27       |
| DcPLV            | 87,537                       | 0.78       |
| DcDNV            | 8,843                        | 0.08       |
| DcBV-Seg. L      | 23,843                       | 0.5        |
| DcBV-Seg. M      | 2,646                        | 0.02       |
| DcBV-Seg. S      | 750                          | <0.01      |
| DcACV- RNA1      | 814                          | 0.01       |
| DcACV- RNA2      | 2,601                        | 0.02       |
| <b>Small RNA</b> | 8,319,921                    | 100        |
| DcRV-Seg.1       | 177,671                      | 2.14       |
| DcRV-Seg.2       | 131,100                      | 1.58       |
| DcRV-Seg.3       | 159,437                      | 1.92       |
| DcRV-Seg.4       | 145,184                      | 1.75       |
| DcRV-Seg.7       | 87,778                       | 1.06       |
| DcRV-Seg.8       | 100,271                      | 1.21       |
| DcRV-Seg.10      | 93,111                       | 1.12       |
| DcPLV            | 122,044                      | 1.47       |
| DcDNV            | 161                          | <0.01      |
| DcBV-Seg. L      | 2,260                        | 0.02       |
| DcBV-Seg. M      | 2,145                        | 0.02       |
| DcBV-Seg. S      | 676                          | 0.01       |

DcPLV, *Diaphorina citri* Picorna-like virus; DcRV, *Diaphorina citri* reovirus; DcDNV, *Diaphorina citri* densovirus; DcACV, *Chronic bee paralysis virus*; DcBV, *Diaphorina citri* bunyavirus; Seg., Segment; L, Large; M, Medium; S, Small. <sup>a</sup> number of reads after subtracting *D. citri* reads.

Table S2. Significant BLASTx hits to the viral database using contigs created from small RNA/RNA-seq libraries as query sequences.

| Virus Category | Virus Family               | Virus Genus      | Virus Species                                                                                     | Assembled contigs from representative <i>D. citri</i> Populations |
|----------------|----------------------------|------------------|---------------------------------------------------------------------------------------------------|-------------------------------------------------------------------|
| Insect virus   | <i>Reoviridae</i>          | <i>Fijivirus</i> | <i>Nilaparvata lugens reovirus</i>                                                                | CH, TW, FL, HW                                                    |
| Insect virus   | <i>Iflaviridae</i>         | <i>Iflavirus</i> | <i>Deformed wing virus</i>                                                                        | BR, CH, TW                                                        |
| Insect virus   | <i>Parvoviridae</i>        | Various          | Densovirus SC1065, <i>Mythimna loreyi densovirus</i> , Uncharacterized protein in <i>D. citri</i> | CH, TW                                                            |
| Insect virus   | Unclassified               | Unclassified     | <i>Chronic bee paralysis virus</i>                                                                | CH                                                                |
| Insect virus   | <i>Bunyaviridae</i>        | Unclassified     | <i>Wuhan mosquito virus</i> , <i>Wuchang cockroach virus 1</i> , <i>Kigluaik phantom virus</i>    | CH, TW                                                            |
| Bacteriophage  | <i>Unclassified phages</i> | Unclassified     | <i>WO prophage</i>                                                                                | BR, CH, TW, FL, HW                                                |

CH) China; TW) Taiwan; FL) Florida, BR) Brazil; HW) Hawaii.

Table S3. Accession numbers of reference isolates and out-groups used to construct the phylogenetic trees.

| Name                                            | Abbreviation | Accession Number | Name                                    | Abbreviation | Accession Number |
|-------------------------------------------------|--------------|------------------|-----------------------------------------|--------------|------------------|
| <i>Antheraea pernyi iflavivirus</i>             | ApIFV        | YP_009002581     | <i>Drosophila C virus</i>               | DCV          | NP_044945        |
| <i>Deformed wing virus</i>                      | DWV          | AAP49283         | <i>Cricket paralysis virus</i>          | CrPV         | AAF80998         |
| <i>Minute virus of mice</i>                     | MVM          | P07300           | <i>Rice strip virus</i>                 | RSV          | 20428590         |
| <i>Sacbrood virus</i>                           | SBV          | NP_049374        | <i>Acute bee paralysis virus</i>        | ABPV         | NP_066241        |
| <i>Brevicoryne brassicae picorna-like virus</i> | BbPLV        | YP_001285409     | <i>Aphid lethal paralysis virus</i>     | ALPV         | NP_733845        |
| <i>Bunyamwera virus</i>                         | BUNV         | 9630657          | <i>Encephalomyocarditis virus</i>       | EMCV         | NP_056777        |
| <i>Varroa destructor virus-1</i>                | VdV-1        | YP_145791        | <i>Hepatitis A virus</i>                | HAV          | AAA45472         |
| <i>Slow bee paralysis virus</i>                 | SBPV         | YP_003622540     | <i>Nilaparvata lugens reovirus</i>      | NLRV         | BAA08542         |
| <i>Nilaparvata lugens honeydew virus1</i>       | NIHDV1       | BAN19725         | <i>Fiji disease virus</i>               | FDV          | YP_249762        |
| <i>Kakugo virus</i>                             | KV           | YP_015696        | <i>Acinopterus angulatus reovirus</i>   | AcARV        | AFA28393         |
| <i>Formica exsecta virus 2</i>                  | FeV2         | YP_008888537     | <i>Raspberry latent virus</i>           | RpLV         | YP_003934917     |
| <i>Heliconius erato ifavirus</i>                | HeIFV        | YP_009026409     | <i>Aedes pseudoscutellaris reovirus</i> | ApRV         | YP_443935        |
| <i>Lymantria dispar iflavivirus 1</i>           | LdIFV        | YP_009047245     | <i>Heliothis armigera cypovirus 5</i>   | HaCPV5       | YP_001883323     |
| <i>Graminella nigrifrons virus 1</i>            | GnV-1        | YP_009129265     | <i>Rice black streaked dwarf virus</i>  | RBSDV        | NP_620452        |
| <i>Laodelphax striatella honeydew virus 1</i>   | LsHDV1       | YP_009010941     | <i>Mal de Rio Cuarto virus</i>          | MRCV         | YP_956848        |
| <i>Southern rice black-streaked dwarf virus</i> | SRBSDV       | YP_004021936     | <i>Casphalia extranea densovirus</i>    | CeDNV        | NP_694838        |
| <i>Spissistilus festinus reovirus</i>           | SpFRV        | YP_005255246     | <i>Halyomorpha halys virus</i>          | HhV          | YP_008719809     |
| <i>Homalodisca vitripennis reovirus</i>         | HoVRV        | YP_002790884     | <i>Human rotavirus A</i>                | HuRV         | ACV73799         |
| <i>Denrolimus punctatus densovirus</i>          | DpDNV        | YP_164339        | <i>Rice dwarf Virus</i>                 | RDV          | NP_620544        |
| <i>Aedes aegypti densovirus</i>                 | AeDNV        | P27454           | <i>Diatraea saccharalis densovirus</i>  | DsDNV        | O71153           |
| <i>Pseudoplusia includes densovirus</i>         | PiDNV        | YP_007003823     | <i>sea star-associated densovirus</i>   | SSaDV        | AIQ82699         |
| <i>Acheta domesticus densovirus</i>             | AdDNV        | YP_227600        | <i>Mythimna loreyi densovirus</i>       | MIDNV        | NP_958099        |
| <i>Blattella germanica densovirus</i>           | BgDNV        | NP_874381        | <i>Galleria mellonella densovirus</i>   | GmDNV        | NP_899650        |
| <i>Planococcus citri densovirus</i>             | PcDNV        | NP_694843        | <i>Junonia coenia densovirus</i>        | JcDNV        | NP_694824        |
| <i>Periplaneta fuliginosa densovirus</i>        | PfDNV        | NP_051020        | <i>Heterosigma akashiwo RNA virus</i>   | HaRNAv       | AY337486         |
| <i>Myzus persicae densovirus</i>                | MpDNV        | NP_874376        | <i>Densovirus SC116</i>                 | sc116        | AFH02761         |
| <i>Culex pipiens densovirus</i>                 | CpDNV        | YP_002887625     | <i>adeno-associated virus-2</i>         | AAV2         | YP_680422        |
| <i>Encephalomyocarditis virus</i>               | EMCV         | M67473           | <i>Hepatitis A virus</i>                | HAV          | M14707           |
| <i>Feline calicivirus</i>                       | FCV          | M86379           | <i>Rabbit hemorrhagic disease virus</i> | RHDV         | M67473           |

| Name                                     | Abbreviation | Accession Number | Name                               | Abbreviation | Accession Number |
|------------------------------------------|--------------|------------------|------------------------------------|--------------|------------------|
| <i>Parsnip yellow fleck virus</i>        | PYFV         | D14066           | <i>Rice tungro spherical virus</i> | RTSV         | M95497           |
| <i>Anopheles gambiae densovirus</i>      | AgDNV        | YP_002265406     | <i>Human poliovirus 1</i>          | PV           | AAV91151         |
| <i>Cherax quadricarinatus densovirus</i> | CqDNV        | YP_009134732     |                                    |              |                  |

Table S4. Viral sequences identified in global *D. citri* populations.

| <i>D. citri</i><br>population | Putative virus |       |       |       |      | Identification<br>method | <i>D. citri</i><br>population | Putative virus |       |       |       |      | Identification<br>method |
|-------------------------------|----------------|-------|-------|-------|------|--------------------------|-------------------------------|----------------|-------|-------|-------|------|--------------------------|
|                               | DcRV           | DcPLV | DcDNV | DcACV | DcBV |                          |                               | DcRV           | DcPLV | DcDNV | DcACV | DcBV |                          |
| China 1                       | +              | +     | +     | -     | -    | 1, 3                     | Florida 4                     | -              | -     | -     | +     | -    | 3                        |
| China 2                       | +              | +     | +     | +     | +    | 2, 3                     | Florida 5                     | -              | -     | -     | -     | -    | 3                        |
| China 3                       | +              | +     | +     | +     | +    | 3                        | Florida 6                     | -              | -     | -     | -     | -    | 3                        |
| China 4                       | +              | +     | +     | -     | +    | 3                        | Florida 7                     | -              | -     | -     | +     | -    | 3                        |
| China 5                       | +              | +     | +     | -     | +    | 3                        | California 1                  | -              | -     | -     | -     | -    | 3                        |
| Taiwan 1                      | +              | +     | +     | -     | +    | 1, 3                     | California 2                  | -              | -     | -     | +     | -    | 3                        |
| Taiwan 2                      | +              | -     | +     | -     | -    | 3                        | California 3                  | -              | -     | -     | +     | -    | 3                        |
| Taiwan 3                      | -              | -     | +     | -     | -    | 3                        | California 4                  | -              | -     | -     | +     | -    | 3                        |
| Taiwan 4                      | +              | +     | +     | -     | -    | 3                        | Texas 1                       | -              | -     | -     | -     | -    | 3                        |
| Brazil 1                      | -              | +     | -     | -     | -    | 1, 3                     | Texas 2                       | +              | -     | -     | +     | -    | 3                        |
| Brazil 2                      | -              | +     | -     | -     | -    | 2, 3                     | Texas 3                       | -              | -     | -     | -     | -    | 3                        |
| Brazil 3                      | -              | +     | -     | -     | -    | 3                        | Texas 4                       | -              | -     | -     | +     | -    | 3                        |
| Brazil 4                      | -              | +     | -     | -     | -    | 3                        | Hawaii 1                      | +              | -     | -     | -     | -    | 2, 3                     |
| Brazil 5                      | -              | +     | -     | -     | -    | 3                        | Hawaii 2                      | +              | -     | -     | -     | -    | 3                        |
| Florida 1                     | +              | -     | -     | -     | -    | 1, 3                     | Hawaii 3                      | -              | -     | -     | -     | -    | 3                        |
| Florida 2                     | -              | -     | -     | +     | -    | 2, 3                     | Hawaii 4                      | +              | -     | -     | -     | -    | 3                        |
| Florida 3                     | -              | -     | -     | +     | -    | 3                        | Pakistan                      | -              | -     | +     | -     | -    | 3                        |

DcPLV, *Diaphorina citri* Picorna-like virus; DcRV, *Diaphorina citri* reovirus; DcDNV, *Diaphorina citri* densovirus; DcACV, *Chronic bee paralysis virus*; DcBV, *Diaphorina citri* bunyavirus. 1) small RNA deep sequencing; 2) Total RNA sequencing (RNA-seq); 3) RT-PCR
